# Supplementary material for: Return-to-work rates and predictors of absence duration after COVID-19 over the course of the pandemic
Source: PubMed Central journal article supplement (PMC10621901; doi:10.5271/sjweh.4077), 2023-03-30
Supplement: SJWEH-49-182-S001.pdf [file SJWEH-49-182-S001.pdf]

# Return-to-work rates and predictors of absence duration after COVID-19 over the course of the pandemic<sup>1</sup>

by Bart Aben, PhD,<sup>2</sup> Robin N Kok, PhD, Astrid de Wind, PhD

1. Supplementary material
2. Correspondence to: Bart Aben, PhD, HumanTotalCare B.V., Department of Research and Business Development, Zwarte Woud 10, 3524 SJ Utrecht, The Netherlands. [E-mail: b.aben@humantotalcare.nl]

Figure S1. Questions in triage-survey ArboNed.

## Questions in triage-survey ArboNed

What is the reason for your absence?

*If you have multiple health complaints, please choose the group of complaints that represent the primary reason for your absence from work.*

- :  1. Corona  
*(Also choose this option if you have a suspicion)*
2. Influenza or flu-like complaints
3. Physical health complaints  
*(For example: injuries, cardiovascular diseases or complaints to your airways or abdomen)*
4. Mental health and/or stress-related health complaints
5. A combination of physical and mental health/stress-related health complaints
6. Complaints related to pregnancy or childbirth
7. I am waiting for an operation  
*(Not applicable if you suffer from physical complaints)*
8. I am recovering from an operation
9. Other health complaints, namely \_\_\_\_\_

## Questions: coronavirus (COVID-19)

*The answers to the following questions are processed with full regard for privacy law and legislation and are not shared with your employer. If your notification of illness is connected with the COVID-19 coronavirus, it is treated in accordance with our normal rules for notifications of illness.*

*Note: if your health condition worsens, we advise you to telephone your GP. They will assess your risk of COVID-19 infection and, if necessary, contact the GGD on your behalf.*

- Your anonymized answers to the following questions can be used to help research into the effects of the COVID-19 coronavirus on sickness absence. Do you consent to this?
- :  1. Yes, I consent to this
2. No, I do not consent to this

- Do you think you are infected with the COVID-19 coronavirus?
- :  1. Yes, definitely
2. Yes, probably
3. Probably not
4. Definitely not

Has this been medically confirmed?

- :  1. No
2. Yes, my GP, doctor or the Municipal Health Services have told me that I probably have been infected
3. I'm waiting for the results of the test
4. I've been tested for COVID-19 coronavirus and the test confirmed that I DO have it
5. I've been tested for COVID-19 coronavirus and the test confirmed that I do NOT have it

---

Do you have any of the following symptoms?

*Select the symptoms that you have experienced*

- :  1. No, I have none of these symptoms
2. Fever
3. Coughing
4. Fatigue
5. Coughing up mucus
6. Shortness of breath
7. Muscle pains
8. Sore throat
9. Headache
10. Nausea / vomiting
11. Mild rhinitis
12. Intestinal complaints
13. Loss of taste (*added on January 25, 2021*)
14. Other, namely \_\_\_\_\_

How much do you suffer from these symptoms, on a scale of 1 (no suffering) to 10 (a great deal of suffering?)

- :  1. 1
2. 2
3. 3
4. 4
5. 5
6. 6
7. 7
8. 8
9. 9
10. 10
-

Are you in a COVID-19 risk group?

- :  1. Yes  
 2. Perhaps / somewhat  
 3. No
- 

On what grounds are you in a risk group?

*More than one answer may be given*

- :  1. Age  
 2. Chronic illness  
 3. Pulmonary diseases (asthma, COPD)  
 4. Compromised immune system due to disease and/or medication  
 5. Smoking  
 6. Cardiovascular disease  
 7. Diabetes  
 8. Obesity  
 9. Other, namely \_\_\_\_\_
- 

### Additional questions

---

I really like my work

- :  1. No, never  
 2. No, nearly never  
 3. Yes, now and then  
 4. Yes, regularly  
 5. Yes, often  
 6. Yes, very often  
 7. Yes, always
- 

Have you had trouble falling asleep in the past month?

- :  1. Never  
 2. Sometimes  
 3. Regularly  
 4. Often  
 5. Always
-

Supplementary table S1. Characteristics of the participants included in the sample with flu-like symptoms and the samples with different dominant virus types.

| Characteristics                                            | Flu-like symptoms |      |             | COVID-19       |      |             |                |      |             |                  |      |             |
|------------------------------------------------------------|-------------------|------|-------------|----------------|------|-------------|----------------|------|-------------|------------------|------|-------------|
|                                                            |                   |      |             | Alpha dominant |      |             | Delta dominant |      |             | Omicron dominant |      |             |
|                                                            | n                 | %    | M (SD)      | n              | %    | M (SD)      | n              | %    | M (SD)      | n                | %    | M (SD)      |
| Total                                                      | 15 862            | 100  |             | 3651           | 100  |             | 5628           | 100  |             | 15 863           | 100  |             |
| Age (years)                                                |                   |      | 40.7 (12.3) |                |      | 41.9 (11.9) |                |      | 40.2 (12.1) |                  |      | 40.6 (12.3) |
| Sex:                                                       |                   |      |             |                |      |             |                |      |             |                  |      |             |
| male                                                       | 9068              | 57.2 |             | 1929           | 52.8 |             | 2890           | 51.4 |             | 9068             | 57.2 |             |
| female                                                     | 6790              | 42.8 |             | 1722           | 47.2 |             | 2735           | 48.6 |             | 6791             | 42.8 |             |
| prefer not to say                                          | 4                 | 0.0  |             | 0              | 0.0  |             | 3              | 0.1  |             | 4                | 0.0  |             |
| Disease burden (1 to 10)                                   |                   |      |             |                |      | 6.4 (2.4)   |                |      | 6.3 (2.4)   |                  |      | 6.1 (2.4)   |
| Risk group:                                                |                   |      |             |                |      |             |                |      |             |                  |      |             |
| no                                                         |                   |      |             | 2883           | 79.4 |             | 4571           | 81.9 |             | 12 342           | 77.8 |             |
| perhaps/somewhat                                           |                   |      |             | 382            | 10.5 |             | 509            | 9.1  |             | 1349             | 8.5  |             |
| yes*:                                                      |                   |      |             | 366            | 10.1 |             | 499            | 8.9  |             | 1279             | 8.1  |             |
| respiratory disorder (asthma, COPD)                        |                   |      |             | 253            | 34.3 |             | 370            | 37.1 |             | 994              | 38.4 |             |
| age                                                        |                   |      |             | 203            | 27.5 |             | 209            | 21.0 |             | 418              | 16.1 |             |
| chronical disease                                          |                   |      |             | 98             | 13.3 |             | 162            | 16.2 |             | 409              | 15.8 |             |
| cardiovascular disease                                     |                   |      |             | 94             | 12.7 |             | 118            | 11.8 |             | 333              | 12.9 |             |
| diabetes                                                   |                   |      |             | 85             | 11.5 |             | 94             | 9.4  |             | 229              | 8.8  |             |
| obesity                                                    |                   |      |             | 88             | 11.9 |             | 99             | 9.9  |             | 250              | 9.6  |             |
| compromised immune system due to disease and/or medication |                   |      |             | 46             | 6.2  |             | 77             | 7.7  |             | 233              | 9.0  |             |
| smoking                                                    |                   |      |             | 40             | 5.4  |             | 36             | 3.6  |             | 147              | 5.7  |             |
| unknown                                                    |                   |      |             | 20             | 0.0  |             | 49             | 0.0  |             | 893              | 5.6  |             |
| Symptoms*:                                                 |                   |      |             |                |      |             |                |      |             |                  |      |             |
| fatigue                                                    |                   |      |             | 2907           | 80.1 |             | 4265           | 76.4 |             | 10 849           | 72.5 |             |
| coughing                                                   |                   |      |             | 2546           | 70.1 |             | 4174           | 74.8 |             | 11 382           | 76.0 |             |
| headache                                                   |                   |      |             | 2524           | 69.5 |             | 3981           | 71.4 |             | 10 826           | 72.3 |             |
| mild rhinitis                                              |                   |      |             | 2020           | 55.6 |             | 3524           | 63.2 |             | 9030             | 60.3 |             |
| muscle pain                                                |                   |      |             | 2194           | 60.4 |             | 3082           | 55.2 |             | 8090             | 54.0 |             |
| sore throat                                                |                   |      |             | 1444           | 39.8 |             | 2323           | 41.6 |             | 9082             | 60.7 |             |
| fever                                                      |                   |      |             | 1709           | 47.1 |             | 2834           | 50.8 |             | 7345             | 49.1 |             |
| coughing up mucus                                          |                   |      |             | 1133           | 31.2 |             | 1991           | 35.7 |             | 5834             | 39.0 |             |
| shortness of breath                                        |                   |      |             | 1352           | 37.2 |             | 1827           | 32.7 |             | 4457             | 29.8 |             |
| loss of taste                                              |                   |      |             | 1363           | 37.5 |             | 2641           | 47.3 |             | 2409             | 16.1 |             |
| nausea/vomiting                                            |                   |      |             | 592            | 16.3 |             | 830            | 14.9 |             | 1985             | 13.3 |             |

|                     |     |           |     |           |      |           |
|---------------------|-----|-----------|-----|-----------|------|-----------|
| intestinal problems | 495 | 13.6      | 704 | 12.6      | 1674 | 11.2      |
| no complaints       | 106 | 2.9       | 133 | 2.4       | 404  | 2.7       |
| unknown             | 20  | 0.0       | 49  | 0.0       | 893  | 5.6       |
| Job satisfaction**  |     | 5.9 (1.1) |     | 5.8 (1.1) |      | 5.8 (1.1) |
| Sleep disturbance** |     | 1.8 (0.9) |     | 1.9 (0.9) |      | 2.0 (0.9) |

\* Multiple answers possible. \*\* This question was answered only by employees with first day of absence between January 25, 2021 and March 18, 2022 and a self-estimated RTW of more than a week (n =2107 , n =, and n = 2564 for the alpha, delta, and omicron-dominant samples, respectively)

Supplementary table S2. Probability of returning to work after COVID-19 at various RTW rates and in time periods with different dominant virus variants after propensity score matching on age and sex. The sample for flu-like symptoms and the total COVID-19 sample include observations with first day of absence between March 19, 2020 and March 18, 2022. The other samples include observation with first day of absence between February 15, 2021 and June 27, 2021 (alpha dominant), June 28, 2021 and December 27, 2021 (delta dominant), and December 28, 2021 and March 18, 2022 (omicron dominant). The sample of participants with flu-like complaints was matched to the total sample of COVID-19 participants. The delta- and omicron-dominant samples were matched to the alpha-dominant sample.

|                     | Flu-like symptoms |             |                     |              | COVID-19 |             |              |   |                |             |                  |   |                |                  |              |      |                  |             |              |                  |         |
|---------------------|-------------------|-------------|---------------------|--------------|----------|-------------|--------------|---|----------------|-------------|------------------|---|----------------|------------------|--------------|------|------------------|-------------|--------------|------------------|---------|
|                     | n                 | M (SD)      | % (95% CI)          | Mdn (95% CI) | Total    |             |              |   | Alpha dominant |             |                  |   | Delta dominant |                  |              |      | Omicron dominant |             |              |                  |         |
| n                   |                   |             |                     |              | M (SD)   | % (95% CI)  | Mdn (95% CI) | n | M (SD)         | % (95% CI)  | Mdn (95% CI)     | n | M (SD)         | % (95% CI)       | Mdn (95% CI) | n    | M (SD)           | % (95% CI)  | Mdn (95% CI) |                  |         |
| Total               | 15 589            |             |                     |              | 15 589   |             |              |   | 3651           |             |                  |   | 3651           |                  |              |      | 3651             |             |              |                  |         |
| Age                 |                   | 40.7 (12.3) |                     |              |          | 40.8 (12.4) |              |   |                | 41.9 (11.9) |                  |   |                | 42.0 (12.3)      |              |      |                  | 42.1 (12.6) |              |                  |         |
| Sex                 |                   |             |                     |              |          |             |              |   |                |             |                  |   |                |                  |              |      |                  |             |              |                  |         |
| Male                |                   |             | 57.2                |              |          |             |              |   |                |             | 52.8             |   |                |                  |              | 51.1 |                  |             |              | 50.5             |         |
| Female              |                   |             | 42.8                |              |          |             |              |   |                |             | 47.2             |   |                |                  |              | 49.9 |                  |             |              | 49.5             |         |
| Time to RTW in days |                   |             |                     | 6 (6-6)      |          |             |              |   |                |             | 12 (12-12)       |   |                | 15 (14-15)       | 12           |      |                  |             |              | 12 (12-12)       | 7 (7-8) |
| RTW                 |                   |             |                     |              |          |             |              |   |                |             |                  |   |                |                  |              |      |                  |             |              |                  |         |
| ≤ 1 week            |                   |             | 71.6 (70.9-72.3)    |              |          |             |              |   |                |             | 26.8 (26.1-27.4) |   |                | 14.0 (12.9-15.2) |              |      | 24.3 (23.0-25.8) |             |              | 49.5 (47.9-51.1) |         |
| ≤ 3 weeks           |                   |             | 91.9 (91.4-92.3)    |              |          |             |              |   |                |             | 64.4 (63.6-65.1) |   |                | 48.5 (46.9-50.1) |              |      | 66.6 (65.1-68.2) |             |              | 86.6 (85.5-87.7) |         |
| ≤ 6 weeks           |                   |             | 99.2 (99.0-99.4)    |              |          |             |              |   |                |             | 87.9 (87.4-88.4) |   |                | 79.2 (77.9-80.5) |              |      | 89.1 (88.0-90.1) |             |              | 97.0 (96.4-97.5) |         |
| ≤ 12 weeks          |                   |             | 100.0 (100.0-100.0) |              |          |             |              |   |                |             | 92.8 (92.4-93.2) |   |                | 87.2 (86.0-88.2) |              |      | 94.0 (93.2-94.8) |             |              | 98.3 (97.7-98.7) |         |
| ≤ 6 months          |                   |             | 100.0 (100.0-100.0) |              |          |             |              |   |                |             | 98.2 (98.0-98.4) |   |                | 92.9 (92.0-93.7) |              |      | 97.0 (96.3-97.5) |             |              | *                |         |

\* There are no omicron-infected employees with RTW after six months at the time of writing this report. CI=confidence interval.

The survival rate differed between the total COVID-19 sample and the sample with flu-like complaints,  $\chi^2(1)=7398.03$ ,  $P<0.001$ . Multi-variate log-rank tests also showed a difference between the three survival distributions,  $\chi^2(2) =1758.47$ ,  $P<0.001$ . Bonferroni-corrected pairwise comparisons showed differences between all three distributions ( $P$ 's  $<0.001$ ).

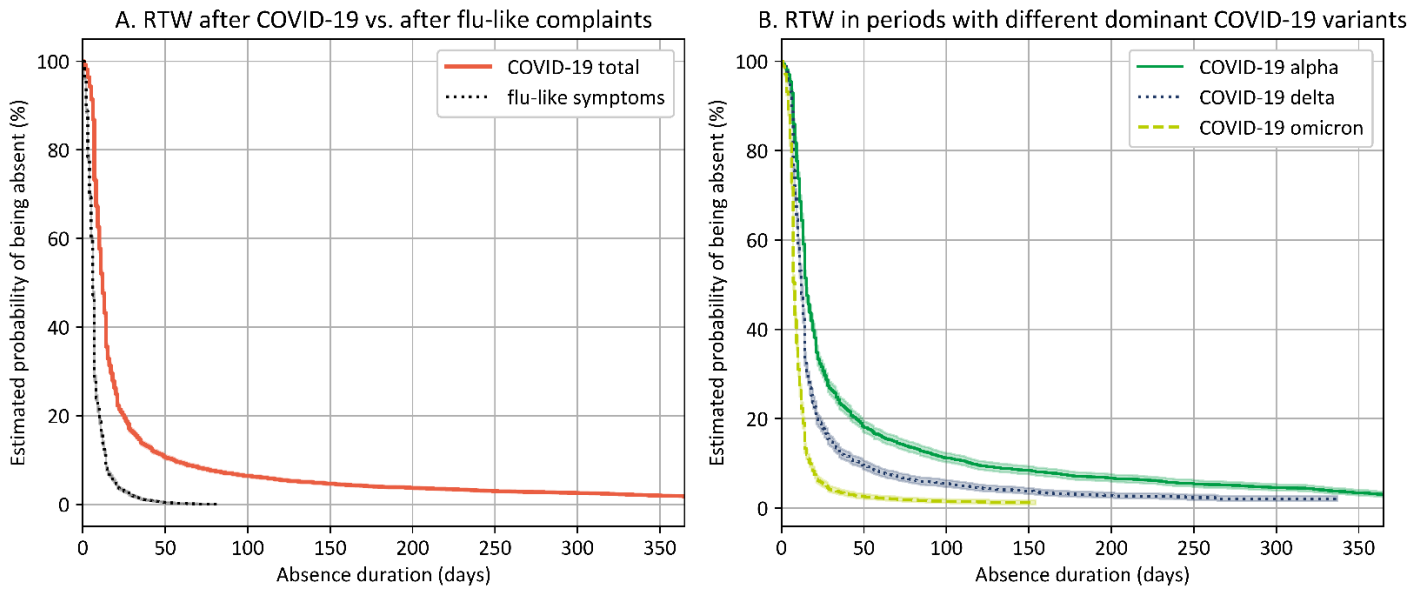

*Supplementary figure S2.* Survival curves after propensity score matching on age and sex. A) Survival curve of employees with self-reported COVID-19 between March 19, 2020 and March 18, 2022 (Covid-19 total), referenced against employees with self-reported flu-like symptoms in the same time period. B) Survival curves of employees with self-reported COVID-19 in time periods with different dominant variant are also displayed. Information on variant dominance was taken from the Dutch National Institute for Public Health and the Environment (RIVM; <https://coronadashboard.government.nl/landelijk/varianten>). Error bands represent exponential Greenwood confidence intervals.
